# Supplementary material for: Variability of heavy metal content in soils of typical Tibetan grasslands
Source: Royal Society of Chemistry journal article supplement (doi:10.1039/c6ra23868h), 2016-01-01

## Supporting Information

### Variability of heavy metal content in soils of typical Tibetan grasslands

Yu-Rong Liu,<sup>a\*</sup> Zi-Yang He,<sup>a</sup> Zi-Ming Yang,<sup>b</sup> Guo-Xin Sun,<sup>a\*</sup> and Ji-Zheng He<sup>a, c</sup>

<sup>a</sup> State Key Laboratory of Urban and Regional Ecology, Research Center for Eco-Environmental Sciences, Chinese Academy of Sciences, Beijing 100085, China

<sup>b</sup> Department of Chemistry, Oakland University, Rochester Hills, MI, USA 48309

<sup>c</sup> Faculty of Veterinary and Agricultural Sciences, the University of Melbourne, Parkville 3010, Victoria, Australia

## Methods

Soil cation exchange capacity (CEC) was measured by extracting exchangeable cations following the method described by. <sup>1</sup> Soil pH was determined using a soil to water ratio of 1 : 2.5 with a pH-meter.. Soil organic carbon was qualified according to the K<sub>2</sub>Cr<sub>2</sub>O<sub>7</sub> oxidation titration method. <sup>2</sup> Soil water content was determined by oven-drying the soil samples at 105°C for 24 h. Soil Clay content Clay content was measured by the pipette method after soil organic matter oxidation with H<sub>2</sub>O<sub>2</sub> and dispersion with sonication. <sup>3</sup>

## References

1. K. P. Kitsopoulos, *Clays and clay minerals*, 1999, 47, 688-696.
2. A. Walkley, *Soil Science*, 1947, 63, 251-264.
3. P. R. Day, *Methods of soil analysis. Part 1. Physical and mineralogical properties, including statistics of measurement and sampling*, 1965, 545-567.

**Table S1** Site information and soil physic-chemical properties of 23 sites from the Tibetan Plateau (TP). SWC, soil water; SOC, soil organic carbon; Clay, percentage of clay component of soil texture; CEC, cation exchange capacity; Precipitation, local average annual precipitation. 1, 2, 3 and 4 represents replicated samples from the same area. Climate data were collected from China Meteorological Bureau.

| Site ID | Location       | pH               | SWC   | SOC                   | Clay  | CEC                      | Precipitation | Humidity | Latitude | Longitude | Altitude |
|---------|----------------|------------------|-------|-----------------------|-------|--------------------------|---------------|----------|----------|-----------|----------|
|         |                | H <sub>2</sub> O | (%)   | (g kg <sup>-1</sup> ) | (%)   | (cmol kg <sup>-1</sup> ) | (mm)          | (%)      | (°N)     | (°E)      | (m)      |
| 1       | Nyingchi-1     | 4.86             | 69.31 | 18.16                 | 53.46 | 24.00                    | 650           | 65       | 29°36'   | 94°36'    | 4194     |
| 2       | Nyingchi-2     | 5.45             | 43.03 | 14.72                 | 64.53 | 13.00                    | 650           | 71       | 29°36'   | 94°38'    | 4510     |
| 3       | Nyingchi-3     | 5.40             | 52.75 | 15.28                 | 61.83 | 30.35                    | 650           | 68       | 29°52'   | 92°32'    | 4187     |
| 4       | Mila Mountains | 4.86             | 42.93 | 10.58                 | 62.37 | 32.06                    | 808           | 67       | 29°49'   | 92°21'    | 4947     |
| 5       | Yangpachen     | 6.32             | 20.48 | 5.97                  | 59.56 | 13.58                    | 400           | 62       | 30°10'   | 90°35'    | 4523     |
| 6       | Damxung        | 5.73             | 28.48 | 11.42                 | 58.97 | 21.94                    | 457           | 49       | 30°31'   | 91°18'    | 4361     |
| 7       | Nagchu-1       | 6.24             | 28.97 | 14.53                 | 55.91 | 21.40                    | 400           | 57       | 31°17'   | 91°48'    | 4669     |
| 8       | Nagchu-2       | 6.31             | 28.43 | 12.49                 | 57.44 | 45.43                    | 400           | 65       | 31°38'   | 92°00'    | 4598     |
| 9       | Nam Co         | 7.44             | 5.98  | 2.98                  | 65.42 | 5.17                     | 410           | 49       | 30°48'   | 91°06'    | 4769     |
| 10      | Baingoin -1    | 7.74             | 8.70  | 2.46                  | 54.35 | 11.55                    | 308           | 32       | 31°17'   | 90°20'    | 4646     |
| 11      | Baingoin -2    | 7.21             | 6.28  | 2.33                  | 1.94  | 4.71                     | 308           | 22       | 31°28'   | 89°54'    | 4762     |
| 12      | Baingoin -3    | 8.14             | 4.92  | 2.02                  | 8.17  | 4.17                     | 308           | 49       | 31°36'   | 89°36'    | 4596     |
| 13      | Nyima-1        | 7.67             | 9.76  | 3.11                  | 15.36 | 14.17                    | 150           | 30       | 31°37'   | 88°52'    | 4641     |
| 14      | Nyima-2        | 7.92             | 6.82  | 3.09                  | 15.61 | 9.69                     | 150           | 28       | 31°54'   | 86°16'    | 4767     |
| 15      | Gerze-1        | 8.18             | 3.09  | 0.82                  | 40.26 | 4.83                     | 189           | 10       | 32°12'   | 84°29'    | 4474     |
| 16      | Gerze2         | 8.73             | 5.32  | 1.94                  | 32.38 | 5.34                     | 189           | 21       | 32°17'   | 84°06'    | 4445     |
| 17      | Cuoqin -1      | 7.99             | 5.35  | 1.65                  | 51.29 | 3.46                     | 100           | 11       | 32°18'   | 85°07'    | 4719     |
| 18      | Cuoqin -2      | 6.83             | 4.75  | 2.81                  | 47.28 | 8.80                     | 100           | 36       | 30°50'   | 85°06'    | 4726     |
| 19      | Cuoqin -3      | 6.88             | 8.10  | 2.42                  | 53.25 | 8.26                     | 100           | 34       | 30°34'   | 85°24'    | 4806     |
| 20      | Cuoqin -4      | 7.43             | 9.02  | 4.73                  | 57.53 | 12.86                    | 100           | 10       | 30°09'   | 85°22'    | 5375     |

|    |          |      |       |      |       |       |     |    |        |        |      |
|----|----------|------|-------|------|-------|-------|-----|----|--------|--------|------|
| 21 | Saga     | 8.06 | 13.28 | 3.70 | 69.88 | 9.00  | 220 | 34 | 29°05' | 85°23' | 4704 |
| 22 | Tingri   | 7.50 | 14.57 | 5.93 | 58.97 | 21.57 | 319 | 46 | 28°51' | 87°20' | 4915 |
| 23 | Shigatse | 8.03 | 9.22  | 1.03 | 67.23 | 6.30  | 300 | 77 | 29°19' | 89°10' | 3834 |

---

**Figure S1** Geographic location of sampling sites (n = 23) across the Tibetan Plateau (TP). The map was generated using ArcGIS 10.0 (<http://www.esri.com/software/arcgis/>). Numerical information is summarized in the Table S1.

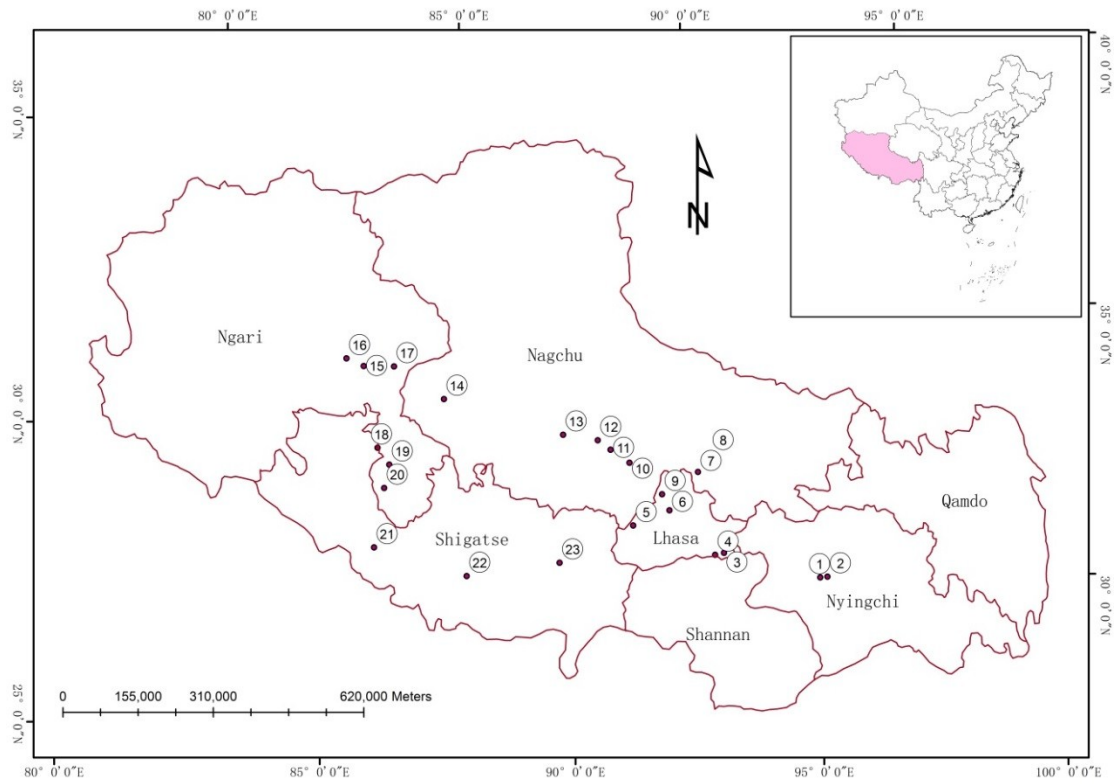

**Figure S2** Concentrations of heavy metals in the topsoils and subsoils of the Tibetan Plateau ( $\text{mg kg}^{-1}$ ). Numerical information is summarized in the Table S1.

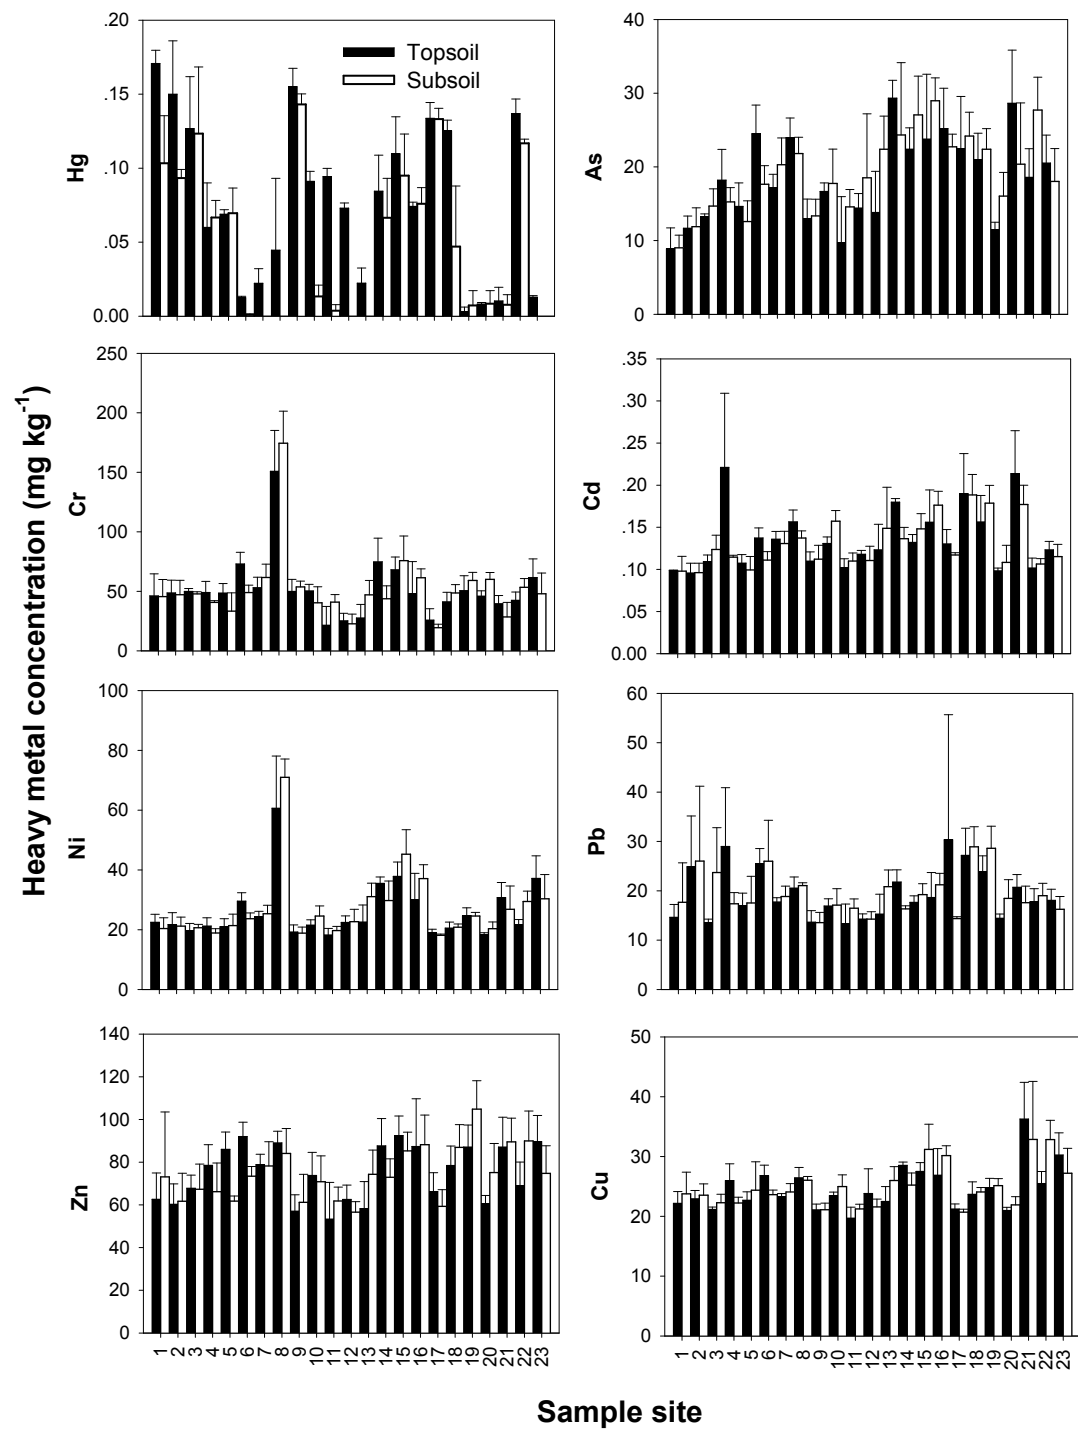

**Figure S3** Relationship between average annual precipitation and longitude (n=23).  
Pearson's  $R^2$  and  $P$  values for the correlation are given in the Figure.

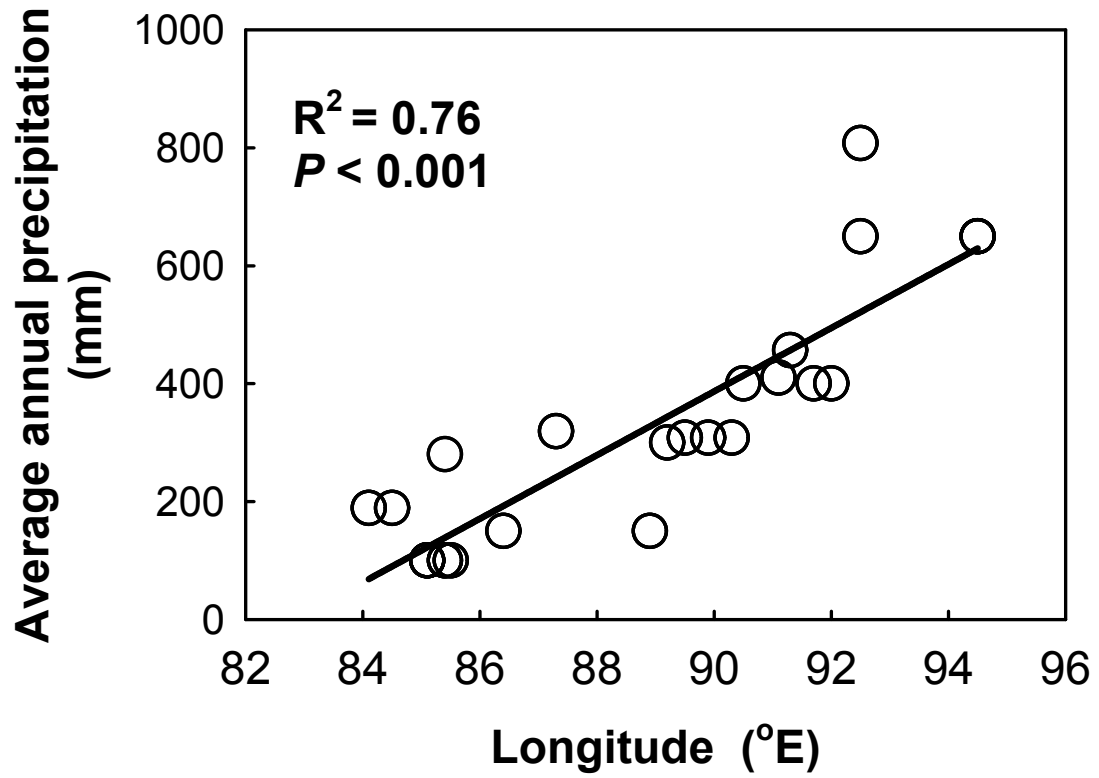

Supplement: c6ra23868h1.pdf [file c6ra23868h1.pdf]
